# Supplementary material for: Antarctic snow algae: unraveling the processes underlying microbial community assembly during blooms formation
Source: Research Square preprint supplement (doi:10.21203/rs.3.rs-2066117/v1), 2023-03-27
Supplement: Supplementary file 1 [file 0bb38f0d8855dc6d3b143bea.xlsx]

## Sheet: Sheet1
Table 1. Overview of samples description and coordinates.
Sample ID	Sampling Date	Site	Description	Longitude (°)	Latitude (°)
S1.1	2019-11-25	1	White snow	57°53'47.2238'' W	63°17'48.0840'' S
S2.1	2019-11-25	2	White snow	57°53'47.9538'' W	63°17'48.4656'' S
S3.1	2019-11-25	3	White snow	57°53'47.8930'' W	63°17'48.8220'' S
S4.1	2019-11-25	4	White snow	57°53'48.6938'' W	63°17'49.1712'' S
S1.2	2019-11-28	1	Green snow	57°53'47.6887'' W	63°17'49.1784'' S
S2.2	2019-11-28	2	Light green snow	57°53'492772'' W	63°17'49.4592'' S
S3.2	2019-11-28	3	White snow	57°53'47.8930'' W	63°17'48.8220'' S
S4.2	2019-11-28	4	White snow	57°53'48.6938'' W	63°17'49.1712'' S
S1.3	2019-12-02	1	Green snow	57°53'47.6887'' W	63°17'49.1784'' S
S2.3	2019-12-02	2	Green snow	57°53'492772'' W	63°17'49.4592'' S
S3.3	2019-12-02	3	Green snow	57°53'47.8930'' W	63°17'48.8220'' S
S4.3	2019-12-02	4	Green snow	57°53'48.6938'' W	63°17'49.1712'' S
S1.4	2019-12-04	1	White snow	57°53'47.6887'' W	63°17'49.1784'' S
S2.4	2019-12-04	2	White snow	57°53'492772'' W	63°17'49.4592'' S
S3.4	2019-12-04	3	White snow	57°53'47.8930'' W	63°17'48.8220'' S
S4.4	2019-12-04	4	White snow	57°53'48.6938'' W	63°17'49.1712'' S
S1.5	2019-12-07	1	Light green snow	57°53'47.6887'' W	63°17'49.1784'' S
S2.5	2019-12-07	2	White snow	57°53'492772'' W	63°17'49.4592'' S
S3.5	2019-12-07	3	White snow	57°53'47.8930'' W	63°17'48.8220'' S
S4.5	2019-12-07	4	Light green snow	57°53'48.6938'' W	63°17'49.1712'' S
S1.6	2019-12-11	1	Green snow	57°53'47.6887'' W	63°17'49.1784'' S
S2.6	2019-12-11	2	White snow	57°53'492772'' W	63°17'49.4592'' S
S3.6	2019-12-11	3	White snow	57°53'47.8930'' W	63°17'48.8220'' S
S4.6	2019-12-11	4	Green snow	57°53'48.6938'' W	63°17'49.1712'' S
S1.7	2019-12-14	1	White snow	57°53'47.6887'' W	63°17'49.1784'' S
S2.7	2019-12-14	2	White snow	57°53'492772'' W	63°17'49.4592'' S
S3.7	2019-12-14	3	White snow	57°53'47.8930'' W	63°17'48.8220'' S
S4.7	2019-12-14	4	White snow	57°53'48.6938'' W	63°17'49.1712'' S
S1.8	2019-12-17	1	Green snow	57°53'47.6887'' W	63°17'49.1784'' S
S2.8	2019-12-17	2	Green snow	57°53'492772'' W	63°17'49.4592'' S
S3.8	2019-12-17	3	Red snow	57°53'47.8930'' W	63°17'48.8220'' S
S4.8	2019-12-17	4	Green snow	57°53'48.6938'' W	63°17'49.1712'' S
S1.9	2019-12-20	1	Red snow	57°53'47.6887'' W	63°17'49.1784'' S
S2.9	2019-12-20	2	Red snow	57°53'492772'' W	63°17'49.4592'' S
S3.9	2019-12-20	3	Green snow	57°53'47.8930'' W	63°17'48.8220'' S
S4.9	2019-12-20	4	Green snow	57°53'48.6938'' W	63°17'49.1712'' S
S1.10	2019-12-23	1	Red snow	57°53'47.6887'' W	63°17'49.1784'' S
S2.10	2019-12-23	2	Green snow	57°53'492772'' W	63°17'49.4592'' S
S3.10	2019-12-23	3	Red snow	57°53'47.8930'' W	63°17'48.8220'' S
S4.10	2019-12-23	4	Green snow	57°53'48.6938'' W	63°17'49.1712'' S
S1.11	2019-12-26	1	Red snow	57°53'47.6887'' W	63°17'49.1784'' S
S2.11	2019-12-26	2	Green snow	57°53'492772'' W	63°17'49.4592'' S
S3.11	2019-12-26	3	Red snow	57°53'47.8930'' W	63°17'48.8220'' S
S4.11	2019-12-26	4	Green snow	57°53'48.6938'' W	63°17'49.1712'' S
S1.12	2019-12-29	1	Red snow	57°53'47.6887'' W	63°17'49.1784'' S
S2.12	2019-12-29	2	Green snow	57°53'492772'' W	63°17'49.4592'' S
S3.12	2019-12-29	3	Red snow	57°53'47.8930'' W	63°17'48.8220'' S
S4.12	2019-12-29	4	Green snow	57°53'48.6938'' W	63°17'49.1712'' S
