# Supplementary material for: Antarctic snow algae: unraveling the processes underlying microbial community assembly during blooms formation
Source: Research Square preprint supplement (doi:10.21203/rs.3.rs-2066117/v1), 2023-03-27
Supplement: Supplementary file 2 [file 1bdf62709242ee7f7d39a76e.docx]

**Antarctic snow algae: unraveling the processes underlying microbial community assembly during blooms formation**

Daniela F. Soto,1,2*  Iván Gómez,1,2 and Pirjo Huovinen1,2

1Instituto de Ciencias Marinas y Limnológicas, Universidad Austral de Chile,Valdivia, Chile.

2 Research Centre on Dynamics of High Latitude Marine Ecosystems (IDEAL), Valdivia, Chile.

* **Corresponding author**:

Daniela F. Soto

Instituto de Ciencias Marinas y Limnológicas, Facultad de Ciencias, Edificio Emilio Pugin 1er Piso, Campus Isla Teja, Universidad Austral de Chile, Valdivia, Chile.

e-mail address: daniela.soto@uach.cl

phone/fax number: (56) 63 2221210 - 221455


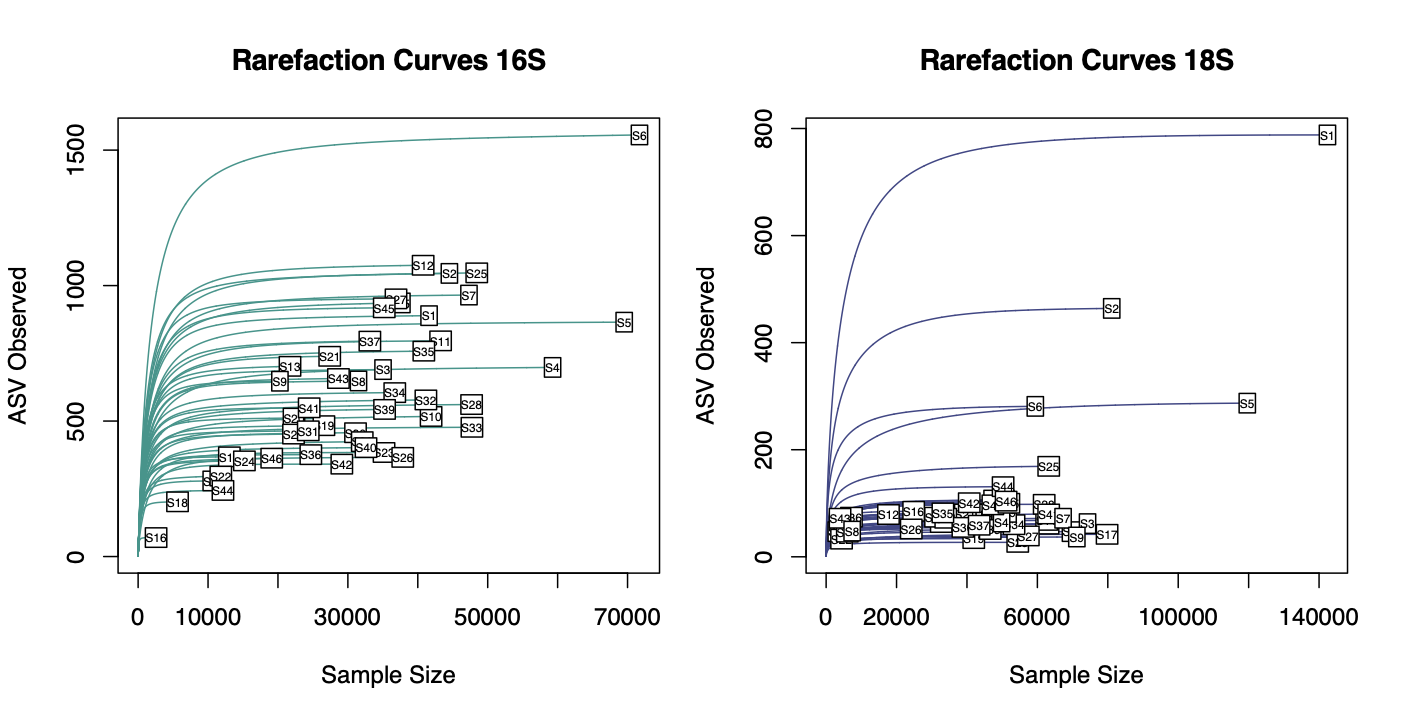


**Supplementary Fig. 1.** Rarefaction curves of bacterial and eukaryotic (16S rRNA and 18S rRNA genes) ASVs.


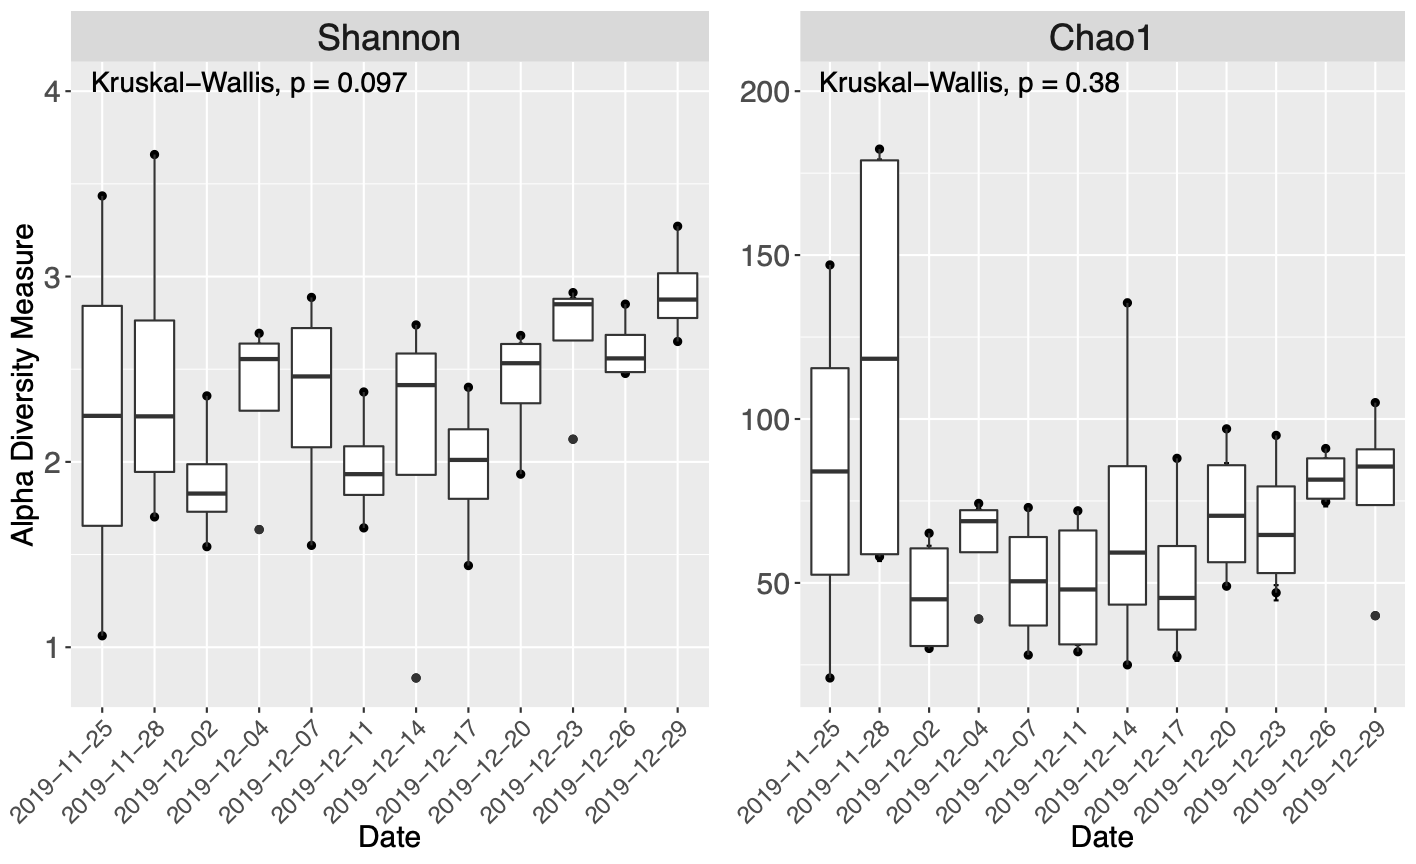


**Supplementary Fig. 2. Boxplots of Shannon-Wiener diversity index and Richness (Chao 1) of bacterial communities in snow samples collected at O’Higgins.** Statistical comparations were performed on the community structure based in metabarcoding using sampling day as categorical variable.


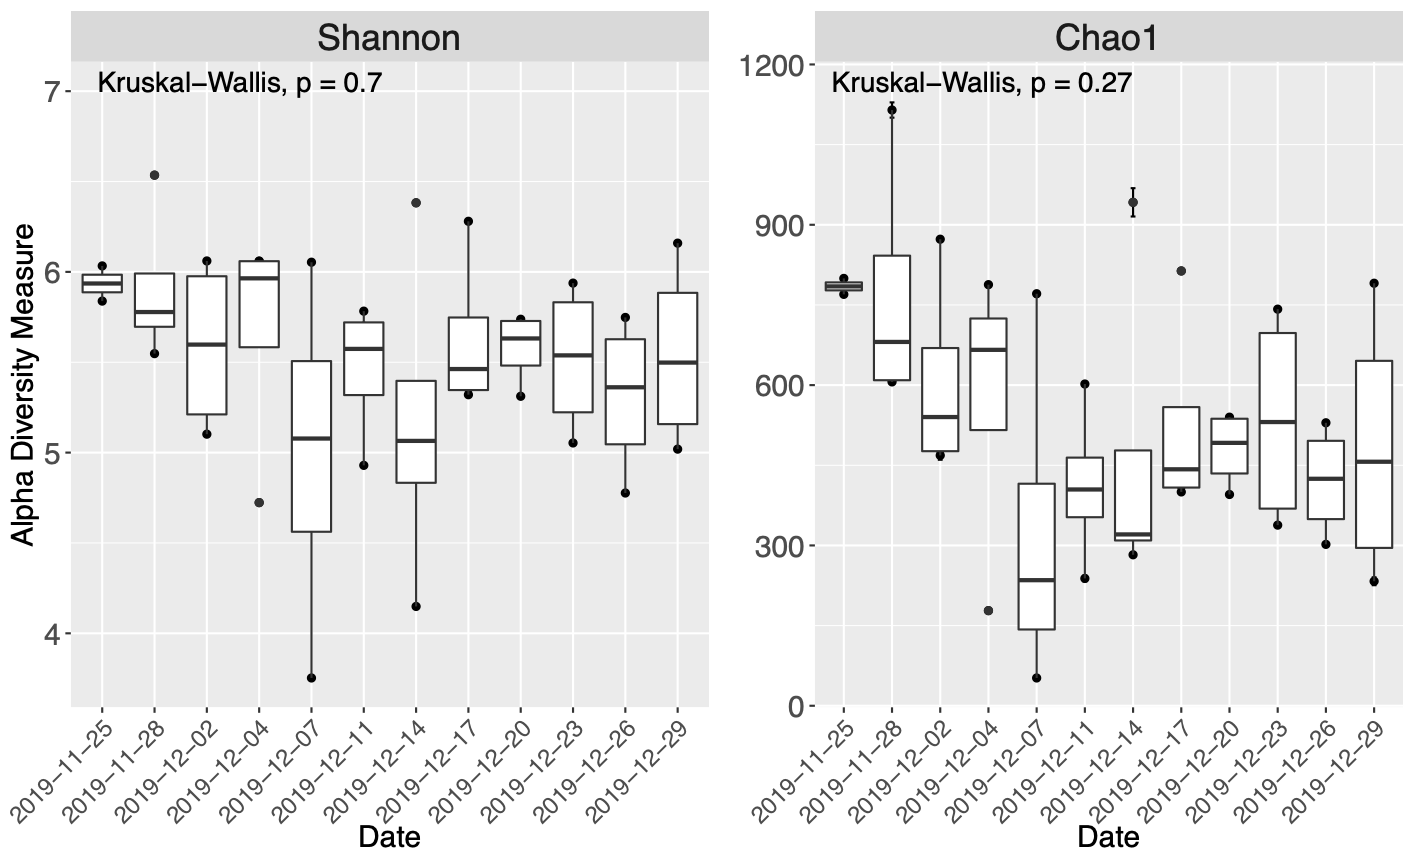


**Supplementary Fig. 3. Lineplots of Shannon-Wiener diversity index and Richness (number of species) of eukaryotic communities in snow samples collected at O’Higgins.** Statistical comparations were performed on the community structure based in metabarcoding using sampling day as categorical variable.
